# Supplementary material for: GCY-8, PDE-2, and NCS-1 are critical elements of the cGMP-dependent thermotransduction cascade in the AFD neurons responsible for C. elegans thermotaxis
Source: PubMed Central journal article supplement — J Gen Physiol. 2013 Oct;142(4):437–49. doi: 10.1085/jgp.201310959 (PMC3787776; doi:10.1085/jgp.201310959), 2013-10
Supplement: supp_jgp.201310959_JGP_201310959_sm.pdf [file supp_jgp.201310959_JGP_201310959_sm.pdf]

Wang et al., <http://www.jgp.org/cgi/content/full/jgp.201310959/DC1>

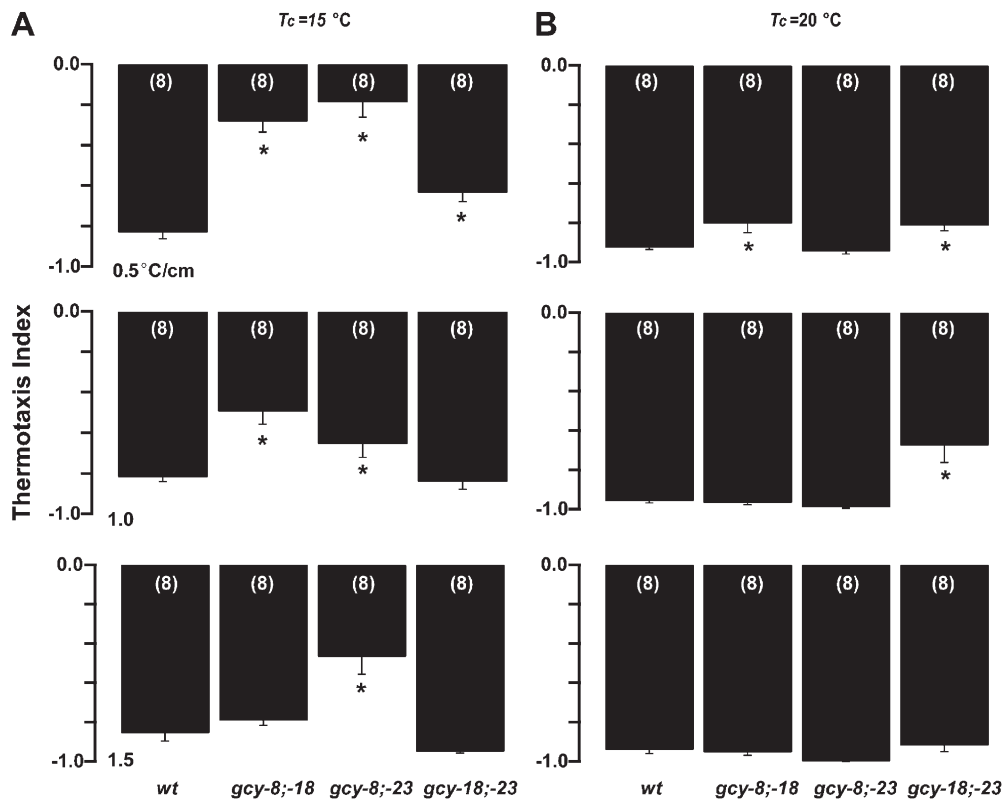

**Figure S1.** AFD-specific GCY proteins act nonredundantly in thermotaxis. (A and B) Thermotaxis response profiles of *gcy* double mutants at  $T_c = 15^\circ\text{C}$  and  $T_c = 20^\circ\text{C}$ . Bars are mean  $\pm$  SEM; the number of assays is indicated in parentheses. \*,  $P < 0.05$  compared with wild type.

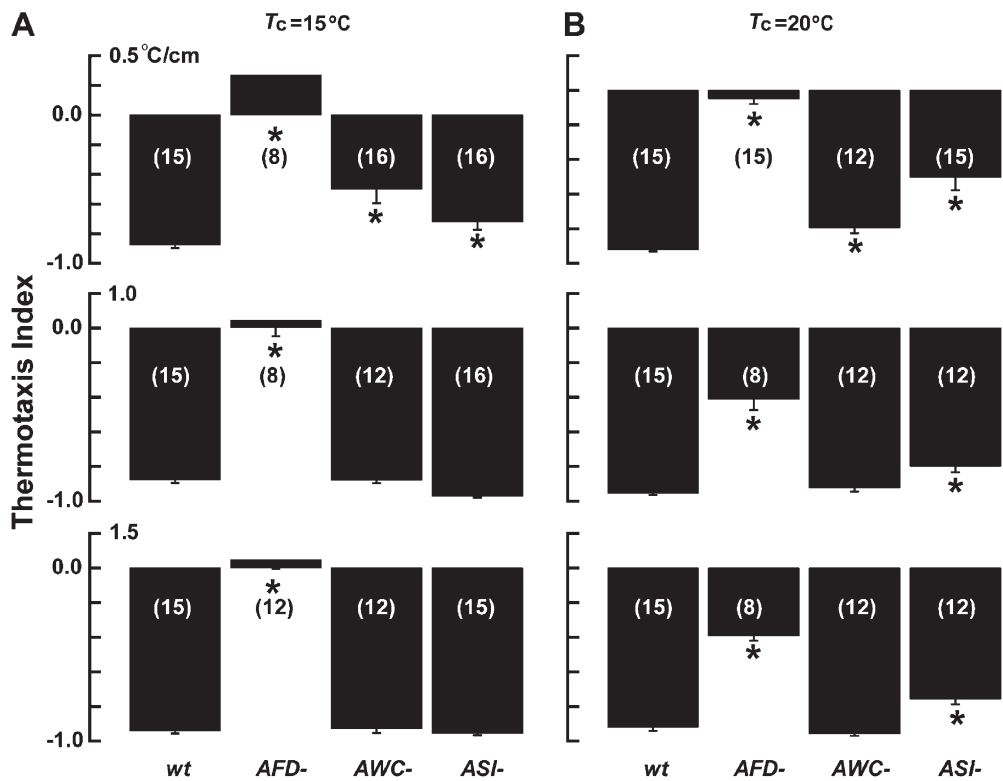

**Figure S2.** Thermal migration is compromised in AFD-, AWC-, and ASI-killed animals. (A and B) Thermotaxis response profiles of AFD-, AWC-, or ASI-killed animals at  $T_c = 15^\circ\text{C}$  and  $T_c = 20^\circ\text{C}$ . Bars are mean  $\pm$  SEM; the number of assays is indicated in parentheses. \*,  $P < 0.05$  compared with wild type.
